# Supplementary material
Source: HighWire-hosted journal article supplement (https://www.haematologica.org/content/suppl/2018/10/01/haematol.2017.187245)
Supplement: 2017_187245-Disclosures_and_Contributions.pdf [file 2017_187245-Disclosures_and_Contributions.pdf]

Haematologica  
HAEMATOL/2017/187245  
Version 3

Circulating iron levels influence the regulation of hepcidin following stimulated erythropoiesis.

Cornel S. G. Mircirov, Sarah J. Wilkins, Grace C. C. Hung, Sheridan L. Helman, Gregory J. Anderson, and David M. Frazer

Disclosures: This work was supported by a Project Grant (APP1051764) (G.J.A. and D.M.F.) and a Senior Research Fellowship (G.J.A.) from the National Health and Medical Research Council of Australia, an Australian Government Research Training Program Scholarship (C.S.G.M) and a Top Up Award from the QIMR Berghofer Higher Degrees Committee (C.S.G.M). The authors have no conflicts of interest to declare.

Contributions: CM, SW, GA and DF designed the research. CM, SW, GH, SH and DF performed the research. CM, SW and DF analysed the data. CM, SW, GA and DF wrote the paper.
